# Supplementary material
Source: MDPI journal article supplement (https://www.mdpi.com/2077-0472/13/2/376)
Supplement: s1 [file s1]

**Table S1.** Scheme of field experiment in split-split-plot design.

Replication 1

| Irrigation no           |         |                          |        |                          |         | Irrigation yes           |        |                         |         |                          |        |
|-------------------------|---------|--------------------------|--------|--------------------------|---------|--------------------------|--------|-------------------------|---------|--------------------------|--------|
| 0 kg N·ha <sup>-1</sup> |         | 20 kg N·ha <sup>-1</sup> |        | 40 kg N·ha <sup>-1</sup> |         | 40 kg N·ha <sup>-1</sup> |        | 0 kg N·ha <sup>-1</sup> |         | 20 kg N·ha <sup>-1</sup> |        |
| B – no                  | B – yes | B – yes                  | B – no | B – no                   | B – yes | B – yes                  | B – no | B – no                  | B – yes | B – yes                  | B – no |

Replication 2

| Irrigation yes           |        |                         |         |                          |        | Irrigation no           |         |                          |        |                          |        |
|--------------------------|--------|-------------------------|---------|--------------------------|--------|-------------------------|---------|--------------------------|--------|--------------------------|--------|
| 20 kg N·ha <sup>-1</sup> |        | 0 kg N·ha <sup>-1</sup> |         | 40 kg N·ha <sup>-1</sup> |        | 0 kg N·ha <sup>-1</sup> |         | 20 kg N·ha <sup>-1</sup> |        | 40 kg N·ha <sup>-1</sup> |        |
| B – yes                  | B – no | B – no                  | B – yes | B – yes                  | B – no | B – no                  | B – yes | B – yes                  | B – no | B – yes                  | B – no |

Replication 3

| Irrigation no            |         |                          |        |                         |        | Irrigation yes           |         |                          |         |                         |         |
|--------------------------|---------|--------------------------|--------|-------------------------|--------|--------------------------|---------|--------------------------|---------|-------------------------|---------|
| 40 kg N·ha <sup>-1</sup> |         | 20 kg N·ha <sup>-1</sup> |        | 0 kg N·ha <sup>-1</sup> |        | 20 kg N·ha <sup>-1</sup> |         | 40 kg N·ha <sup>-1</sup> |         | 0 kg N·ha <sup>-1</sup> |         |
| B – no                   | B – yes | B – yes                  | B – no | B – yes                 | B – no | B – no                   | B – yes | B – no                   | B – yes | B – no                  | B – yes |

Explanation:

First factor's levels (irrigation) – 1. irrigation no and 2. irrigation yes.

Second factor's levels (mineral nitrogen fertilization) – 1. 0 kg N·ha<sup>-1</sup>, 2. 20 kg N·ha<sup>-1</sup>, 3. 40 kg N·ha<sup>-1</sup>.

Third factor's levels (use of amino acid biostimulant (B)) – 1. Biostimulant no (B – no), 2. Biostimulant yes (B – yes).
